# Supplementary material
Source: PubMed Central journal article supplement (PMC8167934)
Supplement: NIHMS1693667-supplement-2.pdf [file NIHMS1693667-supplement-2.pdf]

**Table S1. Patient Characteristics and PPI Usage**

| <b>Patient Characteristics</b>         | <b>Total/Death Events</b> | <b>PPI Users/Death Events</b> |
|----------------------------------------|---------------------------|-------------------------------|
| <b>All</b>                             | 6754/1220                 | 840/137                       |
| <b>Mean age of diagnosis</b>           | 58.7 (range 19-102)       |                               |
| <b>Gender</b>                          |                           |                               |
| <b>Male</b>                            | 48/12                     | 5/1                           |
| <b>Female</b>                          | 6706/1211                 | 835/136                       |
| <b>Race</b>                            |                           |                               |
| <b>Caucasian</b>                       | 5297/817                  | 540/71                        |
| <b>Africa American</b>                 | 1340/397                  | 288/65                        |
| <b>Others</b>                          | 117/6                     | 12/1                          |
| <b>Types</b>                           |                           |                               |
| <b>TNBC</b>                            | 500/122                   | 65/13                         |
| <b>Others</b>                          | 3450/574                  | 458/61                        |
| <b>Unknown</b>                         | 2804/137                  | 317/63                        |
| <b>Tumor stages</b>                    |                           |                               |
| <b>Stage 0</b>                         | 593/28                    | 60/1                          |
| <b>Stage 1</b>                         | 1805/180                  | 159/16                        |
| <b>Stage 2</b>                         | 1215/197                  | 121/14                        |
| <b>Stage 3</b>                         | 280/70                    | 25/7                          |
| <b>Stage 4</b>                         | 75/35                     | 7/4                           |
| <b>Unknown</b>                         | 2786/710                  | 468/95                        |
| <b>Metastatic disease at diagnosis</b> |                           |                               |
| <b>Yes</b>                             | 217/108                   | 479/58                        |
| <b>No</b>                              | 3397/270                  | 18/11                         |
| <b>Unknown</b>                         | 3140/842                  | 343/68                        |
| <b>Treatments</b>                      |                           |                               |
| <b>Hormone only*</b>                   | 747/165                   | 125/31                        |
| <b>Chemotherapeutics only**</b>        | 540/141                   | 64/16                         |
| <b>DNA-damaging drugs</b>              | 108/28                    | 12/5                          |
| <b>Non-DNA-damaging drugs</b>          | 133/33                    | 12/3                          |
| <b>Radiation only</b>                  | 964/132                   | 147/14                        |

\*Hormone therapeutites include ER modulators (fulvestrant and tamoxifen), GnRH agonist (goserelin and leuprolide), aromatase inhibitor (anastrozole, exemestane, and letrozole), and HER2 inhibitor (Trastuzumb)

\*\*Chemotherapeutics include DNA-damaging drugs such as anthracyclines (epirubicin, doxorubicin, and liposomal doxorubicin) and cross-linkers (carboplatin, cisplatin, and cyclophosphamide) and other non-DNA-damaging drugs such as anti-mitotic drugs (docetaxel, paclitaxel, vinorelbine) and antimetabolites (capecitabine, gemcitabine, fluorouracil, and methotrexate).

**Table S2. Univariate and multivariate Cox regression analyses of survival**

| Variates                     | Univariate         |                        | Multivariate        |                        |
|------------------------------|--------------------|------------------------|---------------------|------------------------|
|                              | HR (95% CI)        | P                      | HR(95% CI)          | P                      |
| <b>PPI Usage</b>             |                    |                        |                     |                        |
| Users vs Non-Users           | 0.44 (0.37-0.53)   | $<2 \times 10^{-16}$   | 0.40 (0.34-0.48)    | $<2 \times 10^{-16}$   |
| <b>Diagnosis Age</b>         |                    |                        |                     |                        |
| $58 \geq$ vs $\leq 57$       | 1.03 (1.03-1.04)   | $<2 \times 10^{-16}$   | 1.04 (1.03-1.04)    | $<2 \times 10^{-16}$   |
| <b>Race</b>                  |                    |                        |                     |                        |
| AA vs CA                     | 1.42 (1.26-1.60)   | $1.09 \times 10^{-8}$  | 1.38 (1.22-1.56)    | $2.70 \times 10^{-7}$  |
| Others vs CA                 | 0.42 (0.19-0.94)   | 0.034                  | 0.46 (0.21-1.03)    | 0.058                  |
| <b>Tumor Stage</b>           |                    |                        |                     |                        |
| Stage 1 vs 0                 | 1.84 (1.24-2.74)   | 0.0027                 | 1.70 (1.13-2.54)    | 0.010                  |
| Stage 2 vs 0                 | 2.92 (1.97-4.34)   | $1.10 \times 10^{-7}$  | 2.87 (1.92-4.28)    | $2.70 \times 10^{-7}$  |
| Stage 3 vs 0                 | 5.57 (3.59-8.64)   | $1.62 \times 10^{-14}$ | 5.92 (3.81- 9.22)   | $3.33 \times 10^{-15}$ |
| Stage 4 vs 0                 | 15.56 (9.46-25.60) | $<2 \times 10^{-16}$   | 6.17 (3.66-10.42)   | $9.06 \times 10^{-12}$ |
| Unknown vs 0                 | 3.93 (2.70-5.74)   | $1.23 \times 10^{-12}$ | 3.86 (2.64-5.65)    | $3.15 \times 10^{-12}$ |
| <b>Metastasis</b>            |                    |                        |                     |                        |
| Metastasis vs non-metastasis | 10.00 (7.99-12.51) | $<2 \times 10^{-16}$   | 8.40 (6.58-10.75)   | $< 2 \times 10^{-16}$  |
| Unknown vs non-metastasis    | 1.54 (1.33-1.77)   | $3.62 \times 10^{-9}$  | 1.61 (1.39-1.87)    | $3.06 \times 10^{-10}$ |
| <b>Types</b>                 |                    |                        |                     |                        |
| TNBC vs Non-TNBC             | 1.74 (1.43-2.12)   | $3.35 \times 10^{-8}$  | Stratified Variable |                        |

**Table S3. Univariate and multivariate survival analyses of PPI users in different subgroups**

| Patient Subgroups                       | Univariate         |                       | Multivariate       |                       |
|-----------------------------------------|--------------------|-----------------------|--------------------|-----------------------|
|                                         | HR (95% CI)        | P                     | HR (95% CI)        | P                     |
| <b>Caucasian American</b>               |                    |                       |                    |                       |
| PPI Users vs Non-Users                  | 0.38 (0.29-0.48)   | 3.8×10 <sup>-15</sup> | 0.34 (0.27-0.44)   | <2×10 <sup>-16</sup>  |
| <b>African American</b>                 |                    |                       |                    |                       |
| PPI Users vs Non-Users                  | 0.50 (0.38-0.65)   | 2.7×10 <sup>-7</sup>  | 0.49 (0.37-0.64)   | 1.5×10 <sup>-7</sup>  |
| <b>Molecular Subtypes</b>               |                    |                       |                    |                       |
| TNBC (PPI Users vs Non-Users)           | 0.50 (0.28-0.88)   | 0.017                 | 0.49 (0.27-0.87)   | 0.015                 |
| Luminal A (PPI Users vs Non-Users)      | 0.52 (0.65-0.76)   | 6.0×10 <sup>-4</sup>  | 0.46 (0.31-0.68)   | 8.61×10 <sup>-4</sup> |
| Luminal B (PPI Users vs Non-Users)      | 0.34 (0.10-1.16)   | 0.072                 | 0.29 (0.076-1.11)  | 0.070                 |
| HER2+ (PPI Users vs Non-Users)          | 0.49 (0.22-1.01)   | 0.068                 | 0.48 (0.21-1.08)   | 0.076                 |
| <b>Hormone</b>                          |                    |                       |                    |                       |
| PPI Users vs Non-Users                  | 0.60 (0.41-0.89)   | 0.011                 | 0.65 (0.44-0.97)   | 0.037                 |
| <b>Chemotherapy</b>                     |                    |                       |                    |                       |
| PPI Users vs Non-Users                  | 0.53 (0.37-0.75)   | 0.00029               | 0.46 (0.33-0.66)   | 1.6×10 <sup>-5</sup>  |
| <b>DNA-Damaging Drugs</b>               |                    |                       |                    |                       |
| PPI Users vs Non-Users                  | 1.00 (0.97-1.04)   | 0.80                  | 1.00 (0.97-1.04)   | 0.80                  |
| <b>Non-DNA-Damaging Drugs</b>           |                    |                       |                    |                       |
| PPI Users vs Non-Users                  | 0.62 (0.19-2.05)   | 0.44                  | 1.11 (0.30-4.10)   | 0.87                  |
| <b>Radiation</b>                        |                    |                       |                    |                       |
| PPI Users vs Non-Users                  | 0.33 (0.19-0.58)   | 9.9×10 <sup>-5</sup>  | 0.30 (0.17-0.53)   | 2.5×10 <sup>-5</sup>  |
| <b>Recurrence Free Disease</b>          |                    |                       |                    |                       |
| PPI Users vs Non-Users                  | 0.087 (0.039-0.20) | 3.5×10 <sup>-9</sup>  | 0.088 (0.039-0.20) | 4.1×10 <sup>-9</sup>  |
| <b>5-Year Survival After Recurrence</b> |                    |                       |                    |                       |
| PPI Users vs Non-Users                  | 0.47 (0.20-1.06)   | 0.069                 | 0.41 (0.17-0.95)   | 0.038                 |

**Table S4. Univariate and multivariate analyses of different PPIs and dosage on survival**

| PPI Types and Dosing*                      | Univariate        |                       | Multivariate***   |                        |
|--------------------------------------------|-------------------|-----------------------|-------------------|------------------------|
|                                            | HR (95% CI)       | P                     | HR (95% CI)       | P                      |
| <b>Omeprazole Users vs Non-PPI Users</b>   | 0.33 (0.23-0.49)  | 3.03×10 <sup>-8</sup> | 0.27 (0.18-0.40)  | 3.91×10 <sup>-11</sup> |
| <b>Lansoprazole Users vs Non-PPI Users</b> | 0.20 (0.074-0.53) | 0.0013                | 0.25 (0.094-0.67) | 0.006                  |
| <b>Pantoprazole Users vs Non-PPI Users</b> | 0.43 (0.25-0.74)  | 0.0025                | 0.41 (0.24-0.71)  | 0.0014                 |
| <b>Esomeprazole Users vs Non-PPI Users</b> | 0.52 (0.39-0.70)  | 1.39×10 <sup>-5</sup> | 0.48 (0.36-0.64)  | 9.75×10 <sup>-7</sup>  |
| <b>Other PPIs** vs Non-PPI Users</b>       | 0.31 (0.044-2.23) | 0.25                  | 0.49 (0.070-3.51) | 0.48                   |
| <b>Multi-PPI Users vs Non-PPI Users</b>    | 0.53 (0.39-0.71)  | 1.89×10 <sup>-5</sup> | 0.48 (0.36-0.65)  | 1.49×10 <sup>-6</sup>  |
| <b>40 mg Omeprazole vs Non-PPI users</b>   | 0.21 (0.03-1.53)  | 0.09                  | 0.12 (0.02-0.89)  | 0.038                  |
| <b>10-20 mg Omeprazole vs No PPI</b>       | 0.33 (0.21-0.51)  | 2.1×10 <sup>-7</sup>  | 0.28 (0.18-0.43)  | 1.49×10 <sup>-8</sup>  |
| <b>40 mg Esomeprazole vs No PPI</b>        | 0.30 (0.21-0.52)  | 4.2×10 <sup>-7</sup>  | 0.33 (0.21-0.52)  | 1.8×10 <sup>-6</sup>   |
| <b>20 mg Esomeprazole vs No PPI</b>        | 1.0 (0.62-1.61)   | 0.98                  | 0.72 (0.44-1.16)  | 0.18                   |

\*For single PPI analysis, patients who took only one PPI type were used. Patients who took more than one PPI were grouped as multi-PPI users.

\*\*Other PPI users are patients who used either rabeprazole or dexlansoprazole only.

\*\*\*Multivariate includes PPI types, diagnostic age, race, molecular marker (non-TNBC or TNBC), and tumor stage and metastasis upon diagnosis. Values for other variables except PPI types are similar to overall survival analysis as displayed in Table 1 and therefore are omitted here to avoid repeated information.
